# Supplementary material for: Quantitative Laser Biospeckle Method for the Evaluation of the Activity of Trypanosoma cruzi Using VDRL Plates and Digital Analysis
Source: PubMed Central journal article supplement (PMC5137869; doi:10.1371/journal.pntd.0005169), 2016-12-05
Supplement: pntd.0005169.s001.pdf [file pntd.0005169.s001.pdf]

S1 Data  
Statistical Analysis

**QUANTITATIVE LASER BIOSPECKLE METHOD FOR THE  
EVALUATION OF THE ACTIVITY OF *Trypanosoma cruzi* USING  
VDRL PLATES AND DIGITAL ANALYSIS**

Hilda Cristina Grassi, Lisbette C. García, María Lorena Lobo-Sulbarán, Ana Velásquez,  
Francisco A. Andrades-Grassi, Humberto Cabrera, Jesús E. Andrades-Grassi, Efrén D.J.  
Andrades

STATISTICAL ANALYSIS.

PART I: Activity of the Biospeckle Pattern as a function of Parasite Number

DATA

| 2E04<br>p/well | 3E04<br>p/well | 4E04<br>p/well | 0 p/well      |
|----------------|----------------|----------------|---------------|
| Arith<br>Mean  | Arith<br>Mean  | Arith<br>Mean  | Arith<br>Mean |
| 40.748         | 44.083         | 54.742         | 24.996        |
| 37.459         | 45.207         | 52.98          | 21.984        |
| 35.559         | 47.330         | 57.895         | 19.598        |
| 39.022         | 42.913         | 65.189         | 15.453        |
| 40.99          | 46.304         | 53.829         | 20.876        |
| 37.75          | 42.608         | 51.394         | 17.903        |
|                |                | 63.855         | 26.200        |
|                |                | 59.471         | 25.588        |
|                |                | 65.065         | 23.574        |
|                |                |                | 26.786        |
|                |                |                | 18.757        |

ANOVA MODEL

NULL HYPOTHESIS: The Means for 0 parasites/well, 2E04 parasites/well, 3E04 parasites/well and 4E04 parasites/well are equal.

ALTERNATIVE HYPOTHESIS: At least the mean of one of the four groups is statistically different.

|                   | Df | Sum Sq | Mean Sq | F-value | p-value    |
|-------------------|----|--------|---------|---------|------------|
| Parasite quantity | 3  | 6719   | 2239.6  | 150.8   | <2e-16 *** |
| Residuals         | 28 | 416    | 14.8    |         |            |

Since the the p-value ( $2 \times 10^{-16}$ ) is less than the significance level of 0.05, the null hypothesis stating that the mean of the four groups is equal, is rejected.

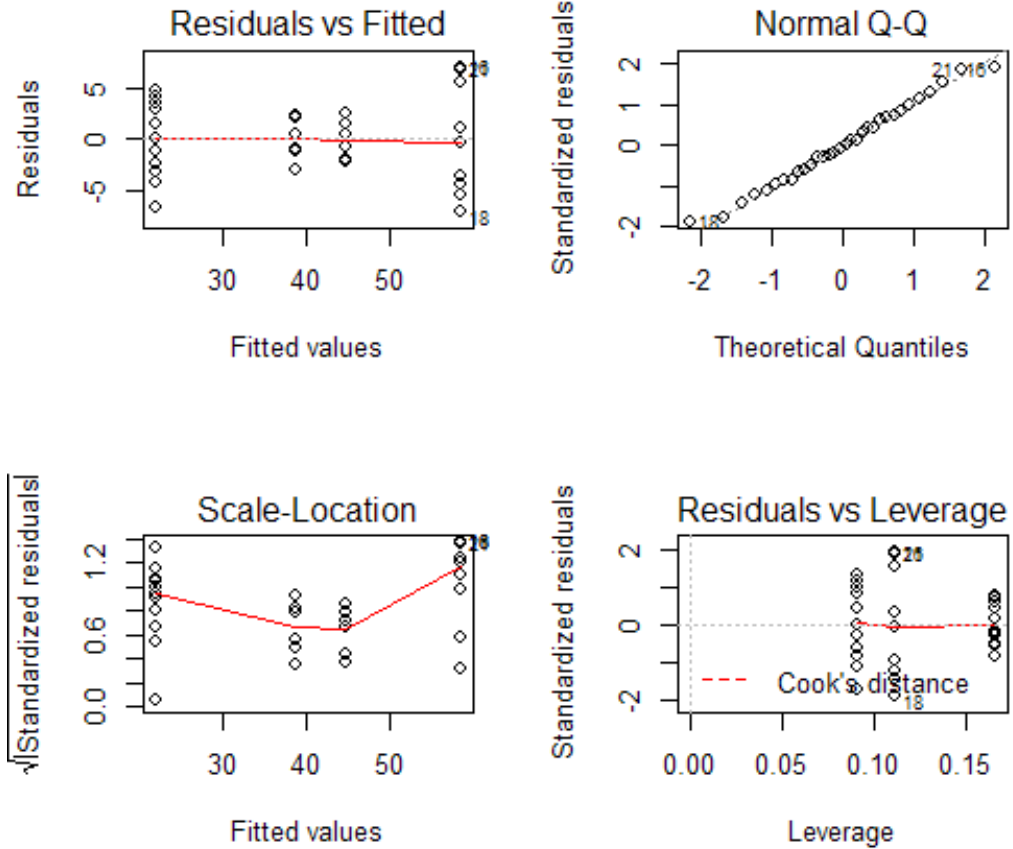

Residuals of the ANOVA Model

|               |        |     |         |
|---------------|--------|-----|---------|
| Breusch-Pagan | BP     | DF  | P-VALUE |
|               | 1.6801 | 1   | 0.1949  |
| Durbin-Watson | DW     | DF  | P-VALUE |
|               | 1.7965 | --- | 0.2541  |

Residuals indicate the presence of a normal distribution. Therefore it is assumed that the number of observations is sufficient for the number of parameters estimated by the ANOVA Model. Additionally, the BREUSCH & PAGAN Test indicates that there is

homoscedasticity of the residuals and the test for autocorrelation of the residuals indicates that there is no remaining autocorrelation, that is, there is a process of White Noise in the residuals. Due to that, the assumptions of the ANOVA Model are accomplished

### TUKEY POST HOC

Since the Null Hypothesis was rejected, a Tukey *post hoc* Test was performed in order to find the combinations by pairs that have statistically different means. All the p-values for the six combinations are less than the significance level of 0.05 which indicates that the mean value between pairs are statistically different.

| Combination<br>(Parasites per well) | Diff  | Lwr   | Upr   | p-value |
|-------------------------------------|-------|-------|-------|---------|
| $2 \times 10^4 - 0$                 | 16.61 | 11.27 | 21.95 | 0       |
| $3 \times 10^4 - 0$                 | 22.76 | 17.42 | 28.10 | 0       |
| $4 \times 10^4 - 0$                 | 36.29 | 31.56 | 41.02 | 0       |
| $2 \times 10^4 - 3 \times 10^4$     | 6.15  | 0.078 | 12.22 | 0.046   |
| $2 \times 10^4 - 4 \times 10^4$     | 19.68 | 14.13 | 25.22 | 0       |
| $3 \times 10^4 - 4 \times 10^4$     | 13.52 | 7.98  | 19.07 | 0       |

Diff: Difference among means, Lwr: Minimum value, Upr: Maximum value, p-value: probability of Error Type I.

### DESCRIPTIVE STATISTICS

|        | M     | SD   | IQR   | VC   | Sk    | K     | 0%    | 25%   | 50%   | 75%   | 100%  | DN |
|--------|-------|------|-------|------|-------|-------|-------|-------|-------|-------|-------|----|
| P0     | 21.97 | 3.77 | 6.11  | 0.17 | -0.29 | -1.13 | 15.45 | 19.18 | 21.98 | 25.29 | 26.79 | 11 |
| P20000 | 38.59 | 2.09 | 2.78  | 0.05 | -0.19 | -1.03 | 35.56 | 37.53 | 38.39 | 40.32 | 40.99 | 6  |
| P30000 | 44.74 | 1.88 | 2.82  | 0.04 | 0.23  | -1.61 | 42.61 | 43.21 | 44.65 | 46.03 | 47.33 | 6  |
| P40000 | 58.27 | 5.41 | 10.03 | 0.09 | 0.22  | -1.77 | 51.39 | 53.83 | 57.90 | 63.86 | 65.19 | 9  |

M: Mean, SD: Standard Deviation, IQR: Inter-quartile Range, VC:Variation Coefficient, Sk: Skewness, K: Kurtosis, DN: Data number.

## STATISTICAL ANALYSIS.

### PART II: Activity of the Biospeckle Pattern as a function of the concentration of benznidazole

DATA. The following data correspond to the benznidazole experiment (Fig 12), with and without parasites and increasing concentrations of the drug, with the addition in each case, of the value for zero concentration. The data were organized in two groups, Group 1 (with parasites and benznidazole) and Group 2 (without parasites and with benznidazole). Each group was further divided in two subgroups: 1,1 with parasites and low concentrations of the drug (0 to 1.25 $\mu$ g/mL); 1,2 with parasites and high concentrations of the drug (5 and 20 $\mu$ g/mL); 2,1 without parasites and low concentrations of the drug (0 to 1.25 $\mu$ g/mL); 2,2 without parasites and high concentrations of the drug (5 and 20 $\mu$ g/mL).

| Concentration | Name                     | C      | Group   | Subgroup  |
|---------------|--------------------------|--------|---------|-----------|
| 20            | Parasites in LIT t1min   | 42.312 | GROUP 1 | GROUP 1,2 |
| 5             | Parasites in LIT t1min   | 40.17  | GROUP 1 | GROUP 1,2 |
| 1.25          | Parasites in LIT t1min   | 44.36  | GROUP 1 | GROUP 1,1 |
| 0.3125        | Parasites in LIT t1min   | 45.175 | GROUP 1 | GROUP 1,1 |
| 0.078125      | Parasites in LIT t1min   | 48.32  | GROUP 1 | GROUP 1,1 |
| 0.01953125    | Parasites in LIT t1min   | 48.568 | GROUP 1 | GROUP 1,1 |
| 0             | Parasites in LIT t1min   | 53.504 | GROUP 1 | GROUP 1,1 |
| 20            | Parasites in LIT t61min  | 41.52  | GROUP 1 | GROUP 1,2 |
| 5             | Parasites in LIT t61min  | 41.051 | GROUP 1 | GROUP 1,2 |
| 1.25          | Parasites in LIT t61min  | 45.36  | GROUP 1 | GROUP 1,1 |
| 0.3125        | Parasites in LIT t61min  | 48.3   | GROUP 1 | GROUP 1,1 |
| 0.078125      | Parasites in LIT t61min  | 47.795 | GROUP 1 | GROUP 1,1 |
| 0.01953125    | Parasites in LIT t61min  | 49.569 | GROUP 1 | GROUP 1,1 |
| 0             | Parasites in LIT t61min  | 53.319 | GROUP 1 | GROUP 1,1 |
| 20            | Parasites in LIT t128min | 46.37  | GROUP 1 | GROUP 1,2 |
| 5             | Parasites in LIT t128min | 44.971 | GROUP 1 | GROUP 1,2 |
| 1.25          | Parasites in LIT t128min | 44.94  | GROUP 1 | GROUP 1,1 |
| 0.3125        | Parasites in LIT t128min | 44.569 | GROUP 1 | GROUP 1,1 |
| 0.078125      | Parasites in LIT t128min | 47.231 | GROUP 1 | GROUP 1,1 |
| 0.01953125    | Parasites in LIT t128min | 47.549 | GROUP 1 | GROUP 1,1 |
| 0             | Parasites in LIT t128min | 52.742 | GROUP 1 | GROUP 1,1 |
| 20            | Parasites in LIT t204min | 30.59  | GROUP 1 | GROUP 1,2 |
| 5             | Parasites in LIT t204min | 33.945 | GROUP 1 | GROUP 1,2 |
| 1.25          | Parasites in LIT t204min | 46.419 | GROUP 1 | GROUP 1,1 |
| 0.3125        | Parasites in LIT t204min | 48.741 | GROUP 1 | GROUP 1,1 |
| 0.078125      | Parasites in LIT t204min | 48.727 | GROUP 1 | GROUP 1,1 |
| 0.01953125    | Parasites in LIT t204min | 49.78  | GROUP 1 | GROUP 1,1 |
| 0             | Parasites in LIT t204min | 52.763 | GROUP 1 | GROUP 1,1 |
| 20            | LIT t1min                | 28.106 | GROUP 2 | GROUP 2,2 |
| 5             | LIT t1min                | 24.848 | GROUP 2 | GROUP 2,2 |

|            |             |        |         |           |
|------------|-------------|--------|---------|-----------|
| 1.25       | LIT t1min   | 23.864 | GROUP 2 | GROUP 2,1 |
| 0.3125     | LIT t1min   | 20.259 | GROUP 2 | GROUP 2,1 |
| 0.01953125 | LIT t1min   | 27.207 | GROUP 2 | GROUP 2,1 |
| 0          | LIT t1min   | 24.996 | GROUP 2 | GROUP 2,1 |
| 20         | LIT t61min  | 22.64  | GROUP 2 | GROUP 2,2 |
| 5          | LIT t61min  | 22.64  | GROUP 2 | GROUP 2,2 |
| 1.25       | LIT t61min  | 17.92  | GROUP 2 | GROUP 2,1 |
| 0.3125     | LIT t61min  | 13.53  | GROUP 2 | GROUP 2,1 |
| 0.01953125 | LIT t61min  | 26.97  | GROUP 2 | GROUP 2,1 |
| 0          | LIT t61min  | 26.2   | GROUP 2 | GROUP 2,1 |
| 20         | LIT t128min | 23.203 | GROUP 2 | GROUP 2,2 |
| 5          | LIT t128min | 18.86  | GROUP 2 | GROUP 2,2 |
| 1,25       | LIT t128min | 17.634 | GROUP 2 | GROUP 2,1 |
| 0,3125     | LIT t128min | 17.972 | GROUP 2 | GROUP 2,1 |
| 0,01953125 | LIT t128min | 28.014 | GROUP 2 | GROUP 2,1 |
| 0          | LIT t128min | 23.574 | GROUP 2 | GROUP 2,1 |
| 20         | LIT t204min | 22.163 | GROUP 2 | GROUP 2,2 |
| 5          | LIT t204min | 23.812 | GROUP 2 | GROUP 2,2 |
| 1.25       | LIT t204min | 22.258 | GROUP 2 | GROUP 2,1 |
| 0.3125     | LIT t204min | 21.498 | GROUP 2 | GROUP 2,1 |
| 0.01953125 | LIT t204min | 29.305 | GROUP 2 | GROUP 2,1 |
| 0          | LIT t204min | 18.757 | GROUP 2 | GROUP 2,1 |

R commander denomination: statistics/numerical summary

|           | mean     | sd       | data:n |
|-----------|----------|----------|--------|
| GROUP 1   | 46.02357 | 5.272927 | 28     |
| GROUP 2   | 22.75958 | 3.947684 | 24     |
|           | mean     | sd       | data:n |
| GROUP 1,1 | 48.38655 | 2.907924 | 20     |
| GROUP 1,2 | 40.11612 | 5.334259 | 8      |
| GROUP 2,1 | 22.49738 | 4.527660 | 16     |
| GROUP 2,2 | 23.28400 | 2.608804 | 8      |

### ANOVA MODEL

NULL HYPOTHESIS: The Means for Groups 1,1; 1,2; 2,1 and 2,2 are equal.

ALTERNATIVE HYPOTHESIS: At least the mean of one of the four Groups is statistically different.

|           | Df | Sum Sq | Mean Sq | F value | Pr(>F)     |
|-----------|----|--------|---------|---------|------------|
| Subgroup  | 3  | 7388   | 2462.8  | 165.3   | <2e-16 *** |
| Residuals | 48 | 715    | 14.9    |         |            |

---

Signif. codes: 0 '\*\*\*' 0.001 '\*\*' 0.01 '\*' 0.05 '.' 0.1 ' ' 1

```
> numSummary(Datos$C, groups=Datos$Subgrupo, statistics=c("mean", "sd"))
```

|           | mean     | sd       | data:n |
|-----------|----------|----------|--------|
| GROUP 1,1 | 48.38655 | 2.907924 | 20     |
| GROUP 1,2 | 40.11612 | 5.334259 | 8      |
| GROUP 2,1 | 22.49738 | 4.527660 | 16     |
| GROUP 2,2 | 23.28400 | 2.608804 | 8      |

Since the the p-value ( $2 \times 10^{-16}$ ) is less than the significance level of 0.05, the null hypothesis stating that the mean of the four Groups is equal, is rejected.

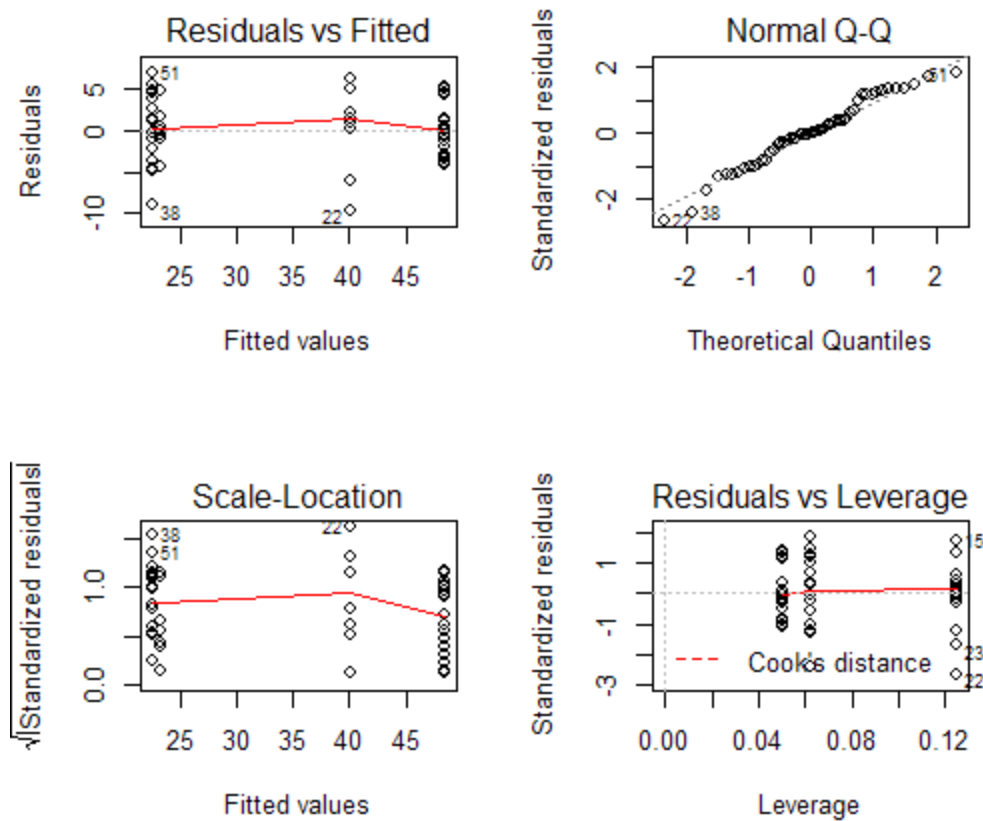

Residuals of the ANOVA Model

## TUKEY POST HOC

Since the Null Hypothesis was rejected, a Tukey *post hoc* Test was performed in order to find the combinations by pairs that have statistically different means. The p-values for 5 of the combinations are less than the significance level of 0.05 which indicates that the mean value between pairs, are statistically different. Only in the case of **GROUP 2,2-GROUP 2,1** the p-value is higher than the significance level of 0.05 which indicates that the mean value between pairs are statistically equal.

Tukey multiple comparisons of means  
95% family-wise confidence level

Fit: aov(formula = C ~ Subgroup, data = Datos)

\$Subgroup

|                     | diff       | lwr        | upr        | p adj     |
|---------------------|------------|------------|------------|-----------|
| GROUP 1,2-GROUP 1,1 | -8.270425  | -12.567287 | -3.973563  | 0.0000308 |
| GROUP 2,1-GROUP 1,1 | -25.889175 | -29.334329 | -22.444021 | 0.0000000 |
| GROUP 2,2-GROUP 1,1 | -25.102550 | -29.399412 | -20.805688 | 0.0000000 |
| GROUP 2,1-GROUP 1,2 | -17.618750 | -22.066424 | -13.171076 | 0.0000000 |
| GROUP 2,2-GROUP 1,2 | -16.832125 | -21.967857 | -11.696393 | 0.0000000 |
| GROUP 2,2-GROUP 2,1 | 0.786625   | -3.661049  | 5.234299   | 0.9651403 |

Bartlett test of homogeneity of variances

data: C by Subgroup

Bartlett's K-squared = 6.6359, df = 3, p-value = 0.08445

Since the p-value (0.08445) is higher than 0.05, the Null Hypothesis is accepted, indicating that the variances are statistically equal. In other words, the variability of the four groups is statistically equal.

Levene's Test for Homogeneity of Variance (center = median)

|       | Df | F value | Pr(>F) |
|-------|----|---------|--------|
| group | 3  | 2.1949  | 0.1008 |

48

Since the p-value (0.1008) is higher than 0.05, the Null Hypothesis is accepted, indicating that the variances are statistically equal. Again, the variability of the four groups is statistically equal.
