# Supplementary material for: Quantitative Laser Biospeckle Method for the Evaluation of the Activity of Trypanosoma cruzi Using VDRL Plates and Digital Analysis
Source: PubMed Central journal article supplement (PMC5137869; doi:10.1371/journal.pntd.0005169), 2016-12-05
Supplement: pntd.0005169.s003.pdf [file pntd.0005169.s003.pdf]

S2 Text

Source Image DP

## QUANTITATIVE LASER BIOSPECKLE METHOD FOR THE EVALUATION OF THE ACTIVITY OF *Trypanosoma cruzi* USING VDRL PLATES AND DIGITAL ANALYSIS

Hilda Cristina Grassi, Lisbette C. García, María Lorena Lobo-Sulbarán, Ana Velásquez, Francisco A. Andrades-Grassi, Humberto Cabrera, Jesús E. Andrades-Grassi, Efrén D.J. Andrades

### Image Delta Processor (ImageDP)

```
package com.bigjocker.images;
```

```
import java.awt.image.BufferedImage;  
import java.awt.image.PixelGrabber;  
import java.io.File;  
import java.util.Arrays;  
import java.util.Comparator;  
import java.util.StringTokenizer;
```

```
import javax.imageio.ImageIO;
```

```
public class ImagesProcessor {  
    public static void main(String[] args) throws Exception {  
        for (int i = 0 ; i < args.length ; i++) {  
            ImagesProcessor.processAll(args[i]);  
        }  
    }  
  
    public static void processAll(String rootFolder) throws Exception {  
        File root = new File(rootFolder);  
        File[] allFiles = root.listFiles();  
        for (File dir: allFiles) {  
            if (dir.isDirectory()) {  
                ImagesProcessor.process(dir.getAbsolutePath());  
            }  
        }  
    }  
  
    public static void process(String folder) throws Exception {  
        File root = new File(folder);  
        File[] allFiles = root.listFiles();  
  
        Arrays.sort(allFiles, new Comparator<File>() {  
            public int compare(File s1, File s2) {  
                StringTokenizer st1 = new StringTokenizer(s1.getName(), " ");  
                StringTokenizer st2 = new StringTokenizer(s2.getName(), " ");
```

```

        while (st1.hasMoreTokens() && st2.hasMoreTokens()) {
            String t1 = st1.nextToken();
            String t2 = st2.nextToken();

            int c;
            try {
                Integer i1 = new Integer(t1);
                Integer i2 = new Integer(t2);
                c = i1.compareTo(i2);
            } catch (NumberFormatException e) {
                c = t1.compareTo(t2);
            }
            if (c != 0) {
                return c;
            }
        }

        return 0;
    }
});

```

```

float tot = 0;
int count = 0;
int percents[] = new int[100];
System.out.print(" ");
for (int i = 0 ; i < allFiles.length - 1 ; i++) {
    File file1 = allFiles[i];
    File file2 = allFiles[i + 1];

    BufferedImage img1 = ImageIO.read(file1);
    BufferedImage img2 = ImageIO.read(file2);

    int[] m1 = ImagesProcessor.getImagePixels(img1);
    int[] m2 = ImagesProcessor.getImagePixels(img2);

    long sum = 0;
    for (int j = 0 ; j < m1.length ; j++) {
        int val = Math.abs(m2[j] - m1[j]);
        sum += val;
    }
    float avg = ((float) sum) / m1.length;

    tot += avg;
    count++;

    int percent = count*100/allFiles.length;
    if (percents[percent] == 0) {
        System.out.print("\b\b");
        if (percent >= 10) {

```

```

        System.out.print("\b");
    }
    System.out.print(percent + "%");
    percents[percent] = 1;
}
}

float totavg = tot/count;
System.out.print("\b\b\b");
System.out.println("For " + root.getAbsolutePath() + " / Total average: " + totavg);
}

public static int[] getImagePixels(BufferedImage image) {
    PixelGrabber grabber = null;
    int[] pixels = new int[image.getWidth() * image.getHeight()];
    try {
        grabber = new PixelGrabber(image, 0, 0, image.getWidth(), image.getHeight(),
pixels, 0, image.getWidth());
        grabber.grabPixels(0);

        for (int i = 0 ; i < pixels.length ; i++) {
            int pixel = pixels[i];

            int alpha = (pixel >> 24) & 0xff;
            int red   = (pixel >> 16) & 0xff;
            int green = (pixel >>  8) & 0xff;
            int blue  = (pixel    ) & 0xff;

            pixels[i] = red;
        }
    } catch (Exception e) {
        e.printStackTrace();
    }
    return pixels;
}
}
}

```
