# Supplementary material for: Quantitative Laser Biospeckle Method for the Evaluation of the Activity of Trypanosoma cruzi Using VDRL Plates and Digital Analysis
Source: PubMed Central journal article supplement (PMC5137869; doi:10.1371/journal.pntd.0005169), 2016-12-05
Supplement: pntd.0005169.s005.pdf [file pntd.0005169.s005.pdf]

S4 Text  
Project Image DP

## QUANTITATIVE LASER BIOSPECKLE METHOD FOR THE EVALUATION OF THE ACTIVITY OF *Trypanosoma cruzi* USING VDRL PLATES AND DIGITAL ANALYSIS

Hilda Cristina Grassi, Lisbette C. García, María Lorena Lobo-Sulbarán, Ana Velásquez,  
Francisco A. Andrades-Grassi, Humberto Cabrera, Jesús E. Andrades-Grassi, Efrén D.J.  
Andrades

### Image Delta Processor (ImageDP)

```
<?xml version="1.0" encoding="UTF-8" ?>
= <projectDescription>
  <name>ImagesDeltaProcessor</name>
  <comment />
  <projects />
= <buildSpec>
= <buildCommand>
  <name>org.eclipse.jdt.core.javabuilder</name>
  <arguments />
  </buildCommand>
  </buildSpec>
= <natures>
  <nature>org.eclipse.jdt.core.javanature</nature>
  </natures>
</projectDescription>
```
