# Supplementary material for: Quantitative Laser Biospeckle Method for the Evaluation of the Activity of Trypanosoma cruzi Using VDRL Plates and Digital Analysis
Source: PubMed Central journal article supplement (PMC5137869; doi:10.1371/journal.pntd.0005169), 2016-12-05
Supplement: pntd.0005169.s006.pdf [file pntd.0005169.s006.pdf]

S5 Text

Classpath Image DP

## QUANTITATIVE LASER BIOSPECKLE METHOD FOR THE EVALUATION OF THE ACTIVITY OF *Trypanosoma cruzi* USING VDRL PLATES AND DIGITAL ANALYSIS

Hilda Cristina Grassi, Lisbette C. García, María Lorena Lobo-Sulbarán, Ana Velásquez, Francisco A. Andrades-Grassi, Humberto Cabrera, Jesús E. Andrades-Grassi, Efrén D.J. Andrades

### Image Delta Processor (ImageDP)

```
<?xml version="1.0" encoding="UTF-8" ?>
= <classpath>
  <classpathentry kind="src" path="src" />
  <classpathentry kind="con"
    path="org.eclipse.jdt.launching.JRE_CONTAINER/org.eclipse.jdt.internal.debu
    g.ui.launcher.StandardVMType/JavaSE-1.6" />
  <classpathentry kind="output" path="bin" />
</classpath>
```
