# Supplementary material for: Quantitative Laser Biospeckle Method for the Evaluation of the Activity of Trypanosoma cruzi Using VDRL Plates and Digital Analysis
Source: PubMed Central journal article supplement (PMC5137869; doi:10.1371/journal.pntd.0005169), 2016-12-05
Supplement: pntd.0005169.s008.pdf [file pntd.0005169.s008.pdf]

# S7 Text

## MANUAL R/SAGA

**QUANTITATIVE LASER BIOSPECKLE METHOD FOR THE EVALUATION OF THE ACTIVITY OF *Trypanosoma cruzi* USING VDRL PLATES AND DIGITAL ANALYSIS**

Hilda Cristina Grassi, Lisbette C. García, María Lorena Lobo-Sulbarán, Ana Velásquez, Francisco A. Andrades-Grassi, Humberto Cabrera, Jesús E. Andrades-Grassi, Efrén D.J. Andrades

**This script was developed by the research group from Venezuela, therefore it was written in Spanish. This User's Manual is a translation to English, but the script and the version of the program are in Spanish.**

## INSTALLATION OF R WITH LINUX OPERATING SYSTEM

- Open Ubuntu, make sure you have an internet connection,
- Go to Ubuntu Software Center and install R and Rcmdr, with Optional ad-ons GNU R package for ODBC database access (r-cran-rodbc)
- When you open Rcmdr the following graphic interface will open

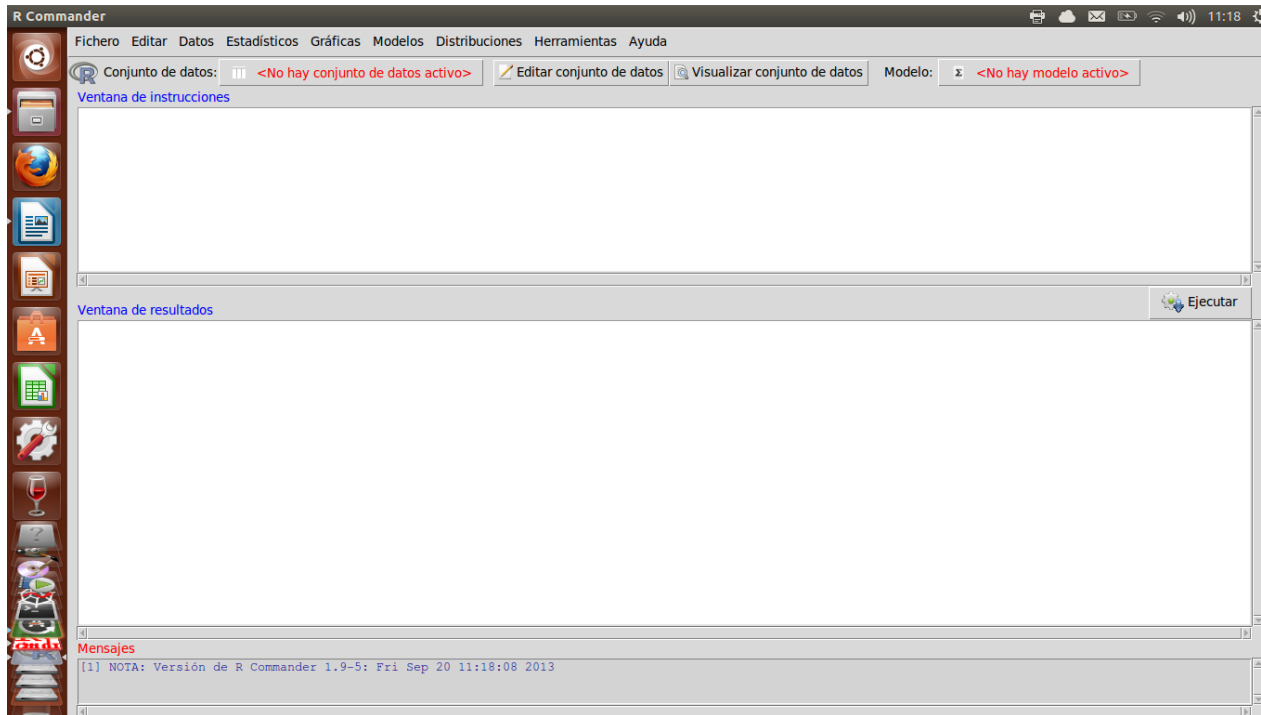

- Type in the console **install.packages ("spatstat")**; **install.packages ("RSAGA")** and **install.packages ("tcltk")** and Execute (**Submit**),
- Select the mirror from which the library will be downloaded, any of the mirrors can be used, **0-cloud** is recommended, click **OK**

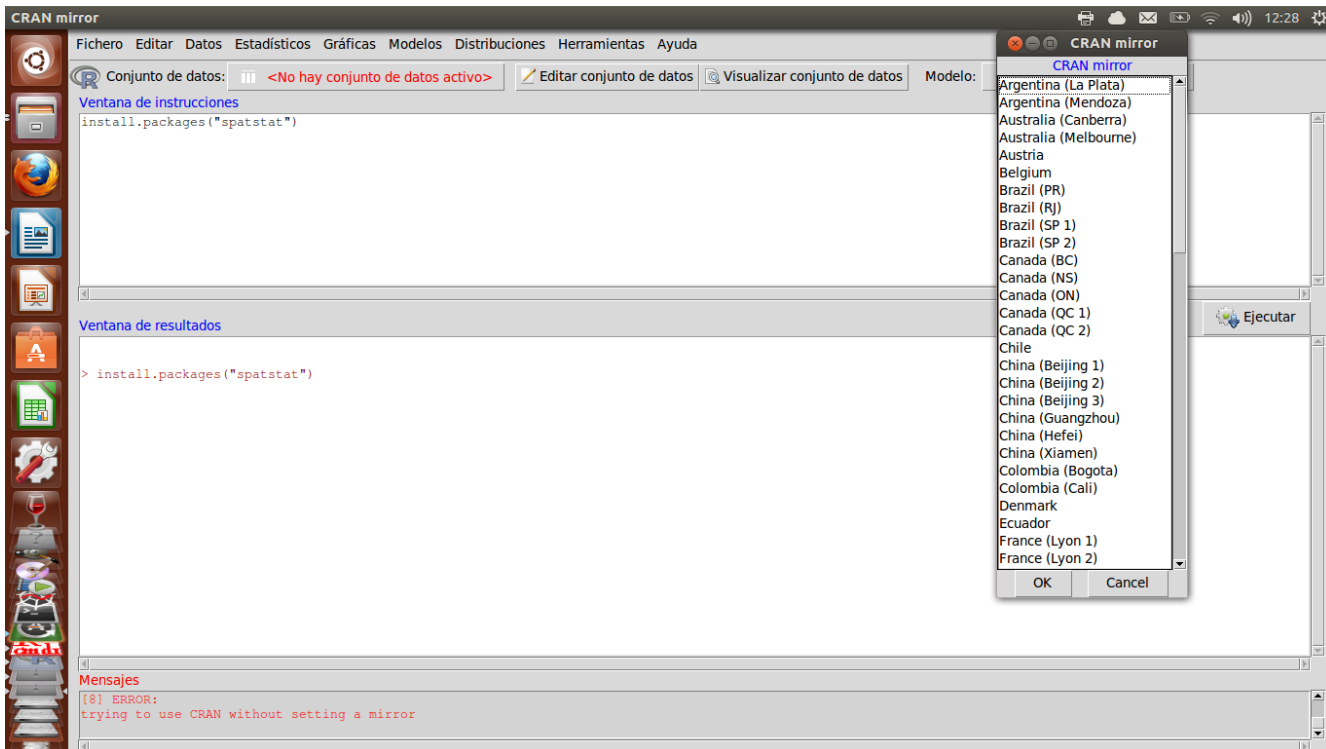

## PREPARATION OF THE IMAGE RASTERS

The first step is to **Convert the video to jpg** with the converter of your preference.

The second step prepares the frames as **.sgrd** files that can be recognized by Rcommander.

- **Open SAGA GIS**, close the window **Tip of the Day**
- Go to **Module/Import-Export GDAL/OGR**
- Go to **GDAL Import raster**
- Select the folder where the frames are saved and select the frames that are to be imported.

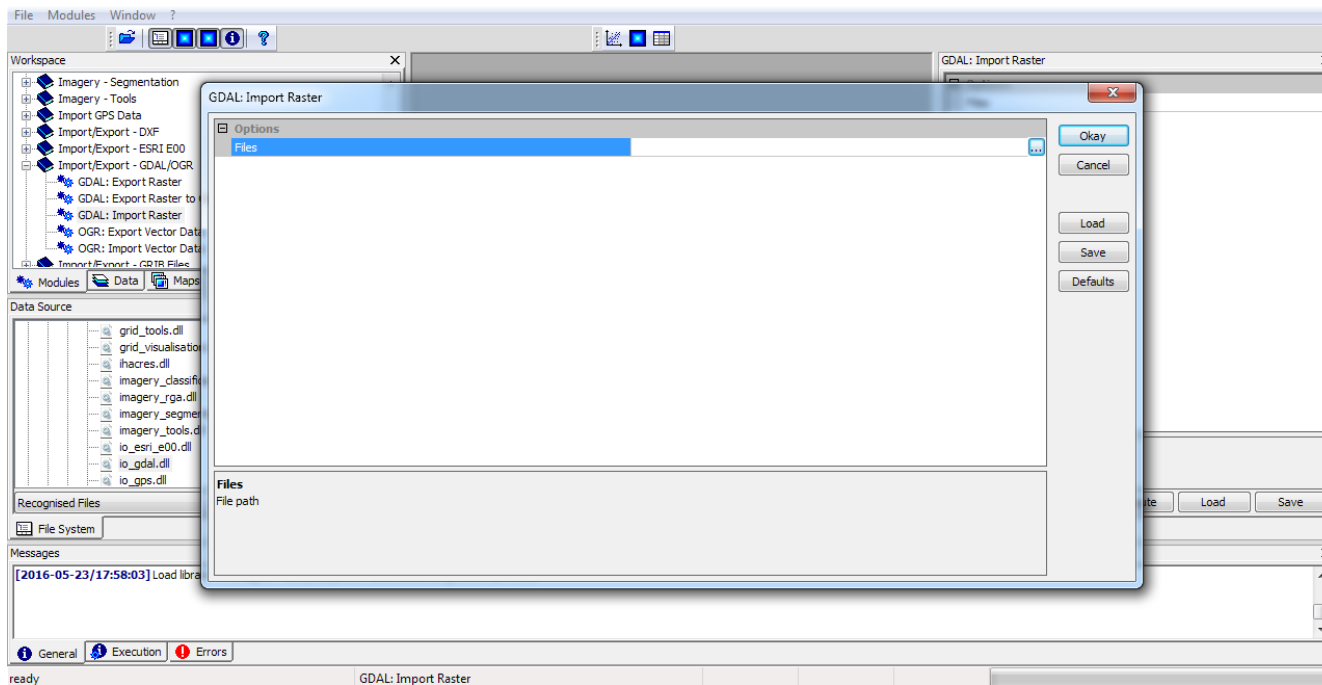

Once the frames are imported,

- Go to **File/Project/Save Project As/** select the folder where the project will be saved

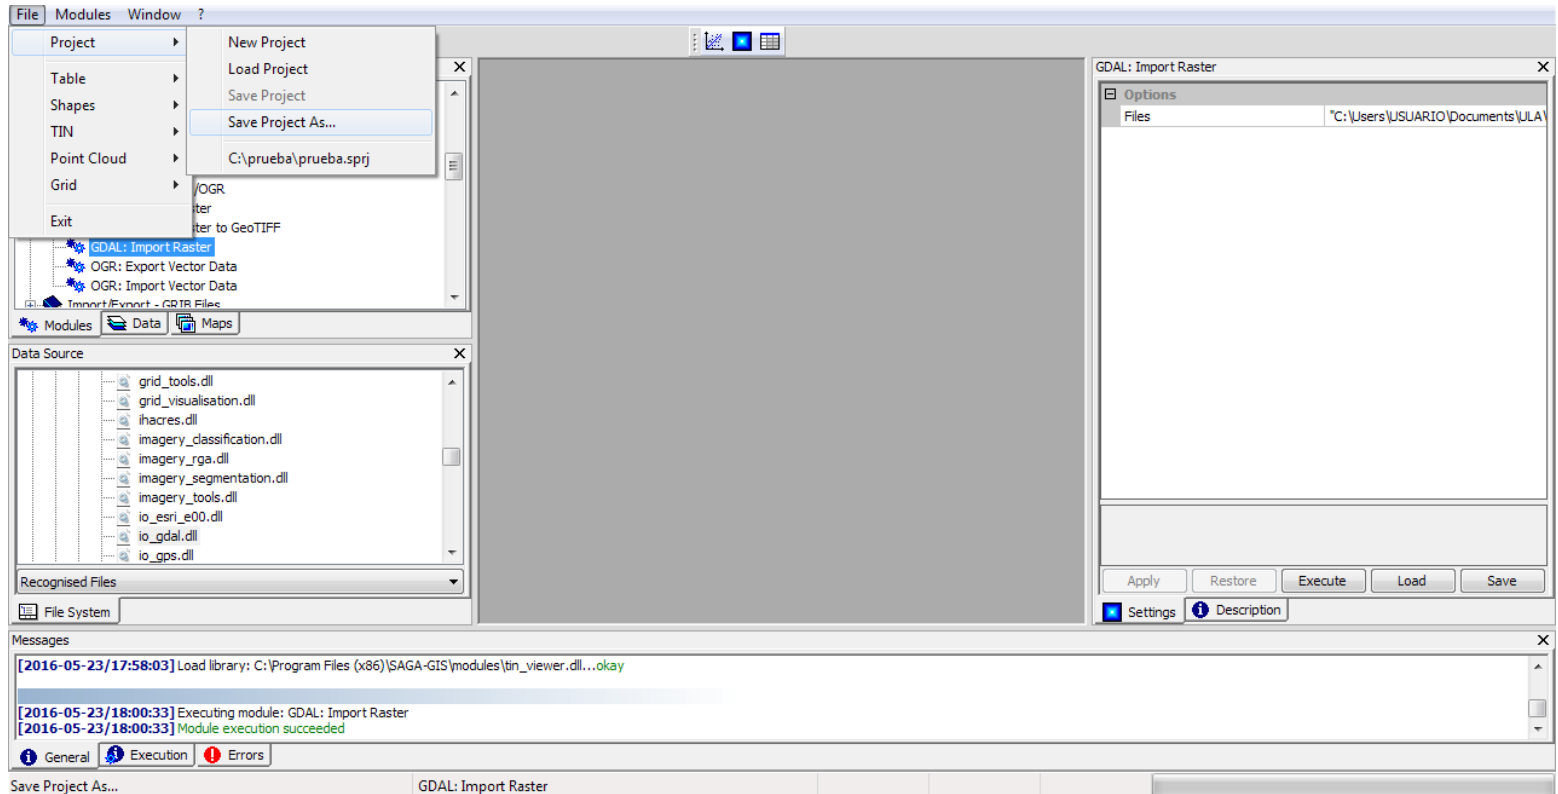

## EXECUTION OF THE SCRIPT R/SAGA (abs sequential)

This is a script that subtracts frames that are in a sequence and creates the rasters with the absolute value of the difference. For example,  $(\text{frame}_2 - \text{frame}_1)$ ;  $(\text{frame}_3 - \text{frame}_2)$ ..... The product will be a raster which is the absolute value of the difference that will also be in a sequence.

**For the execution of the script you must have the following installed:**

Ubuntu 12.10 or higher

R 3.0 or higher

R commander (Recommended) or Rstudio

- Open Ubuntu,
  - Open **R commander (Rcmdr)**
- The following graphic interface will open

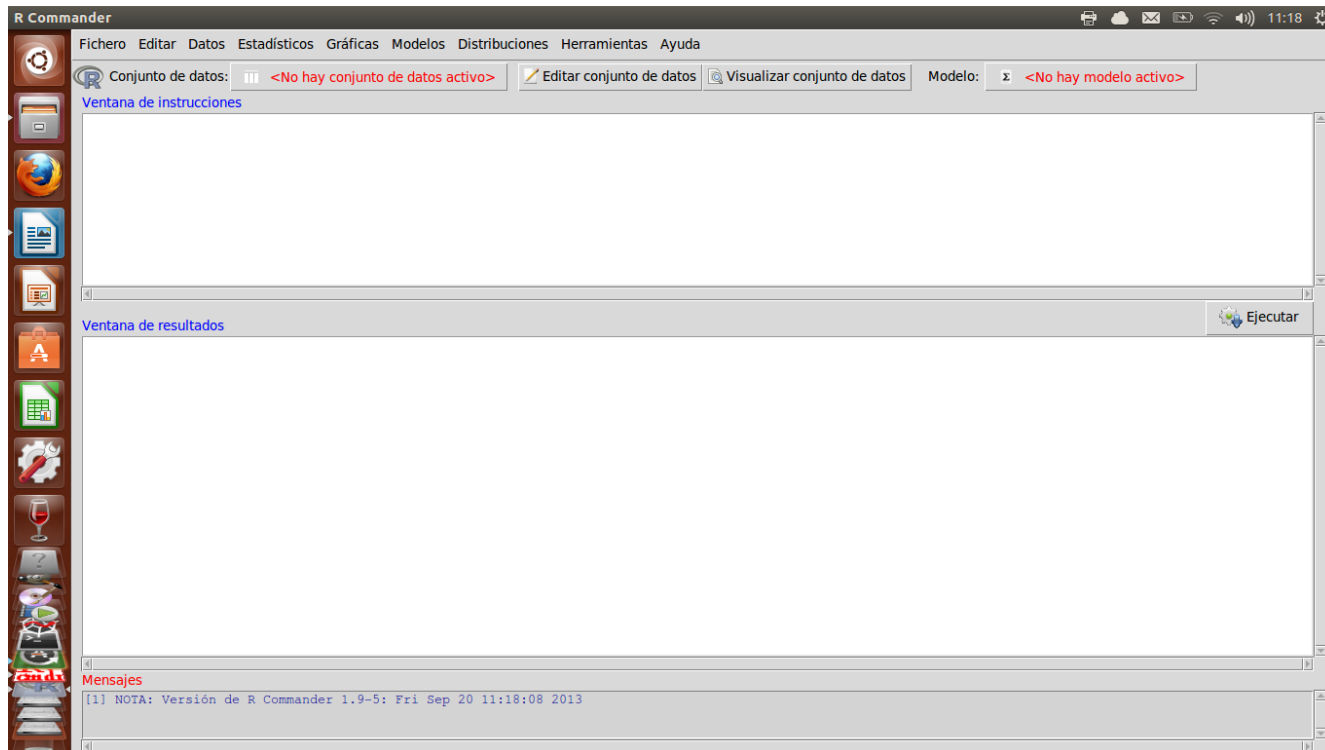

- Go to the menu **File/Open** instruction file

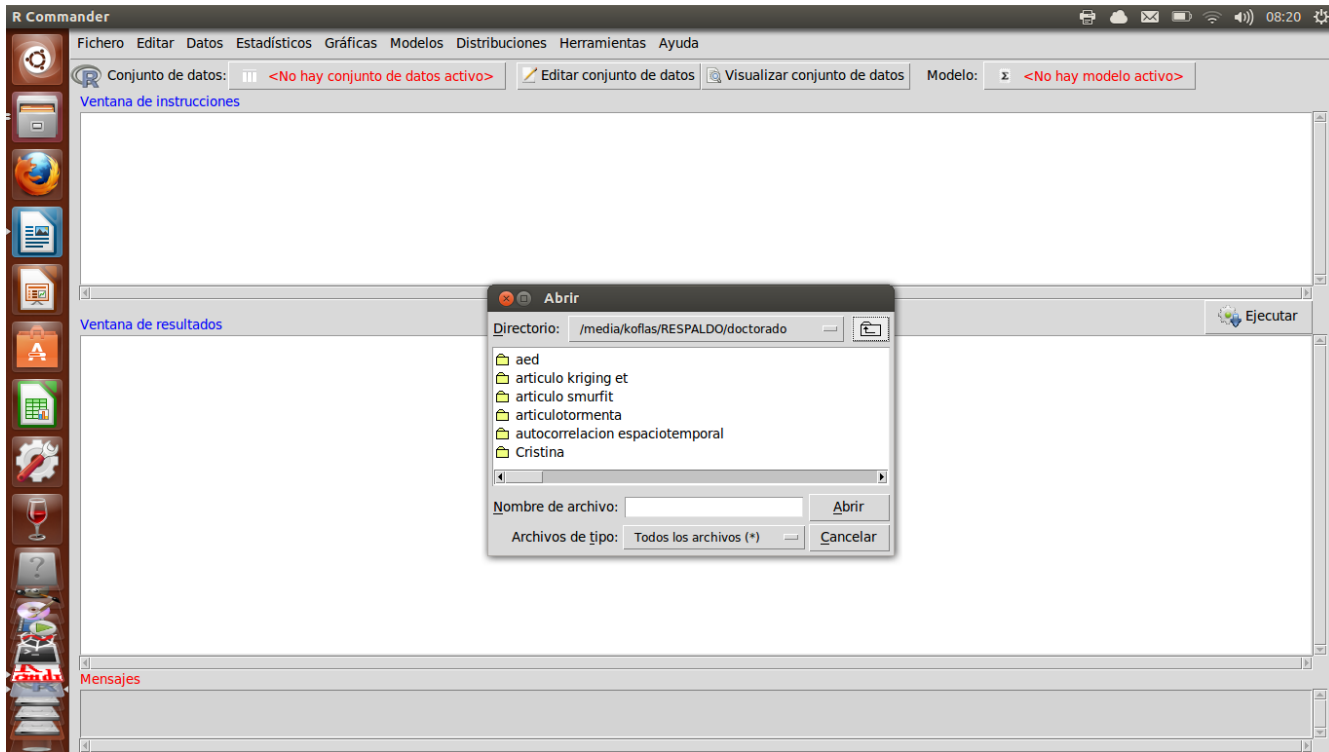



- Go to the location of the script (**diferencia\_abs\_secuencial.R**) and press **Open**

The script will load a series of instructions (The symbol # defines a commentary in the script)

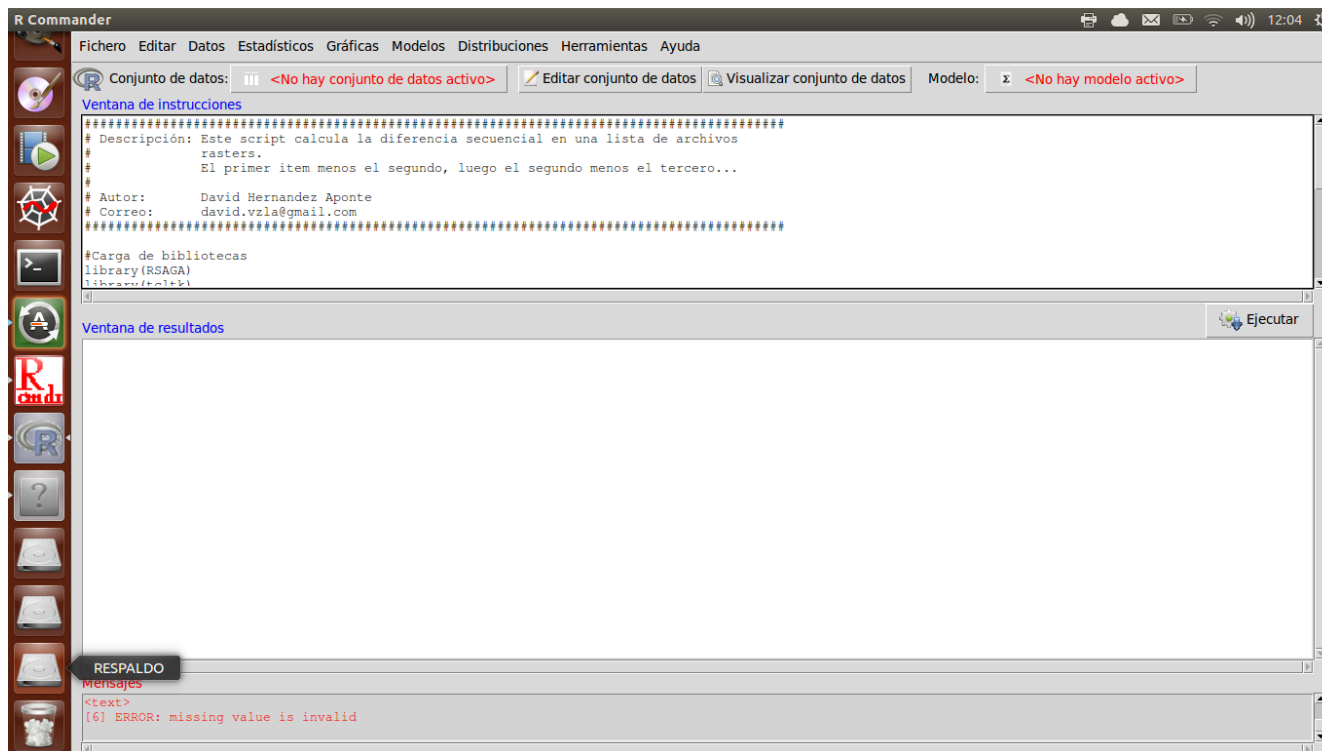

In order to load the RSAGA and tcltk libraries

- Select the code **library(RSAGA) library(tcltk)** and press **Execute (Submit)** which is at the right of the screen of Rcmdr

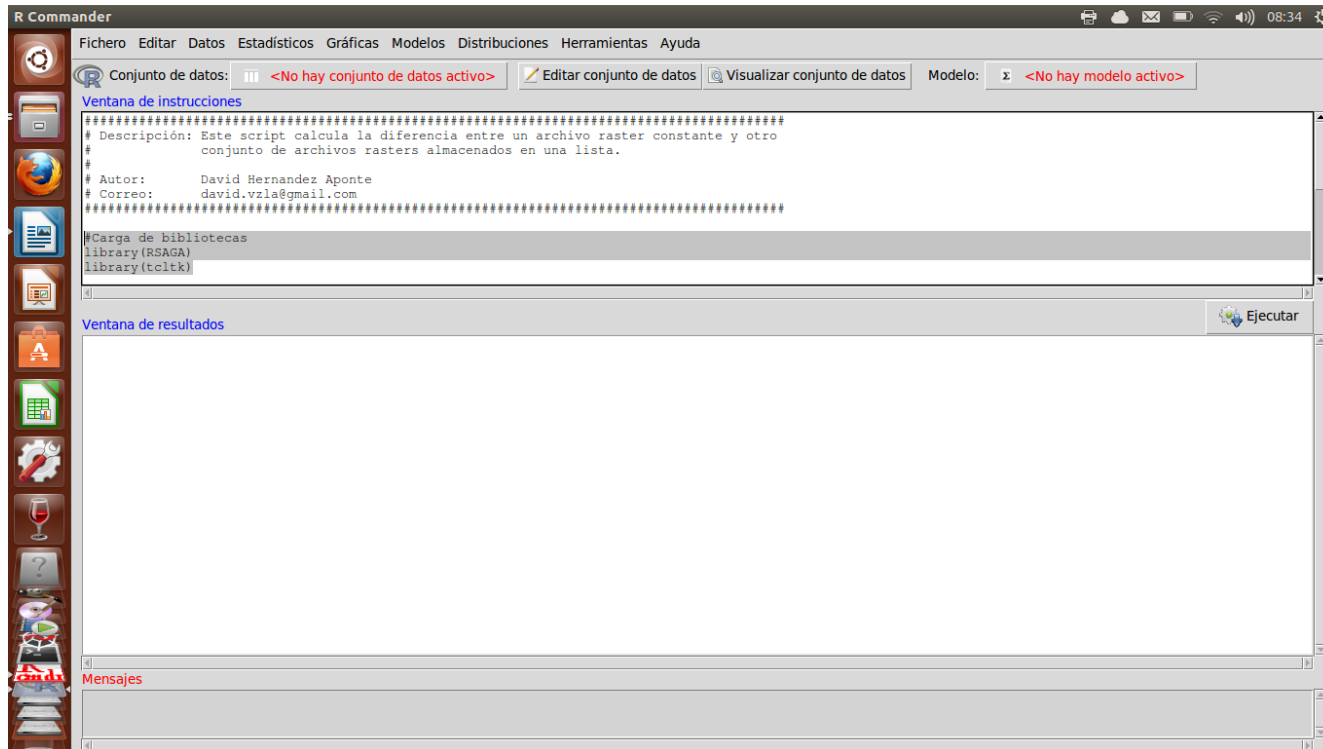

Note that the products of the executed code will appear in the results window

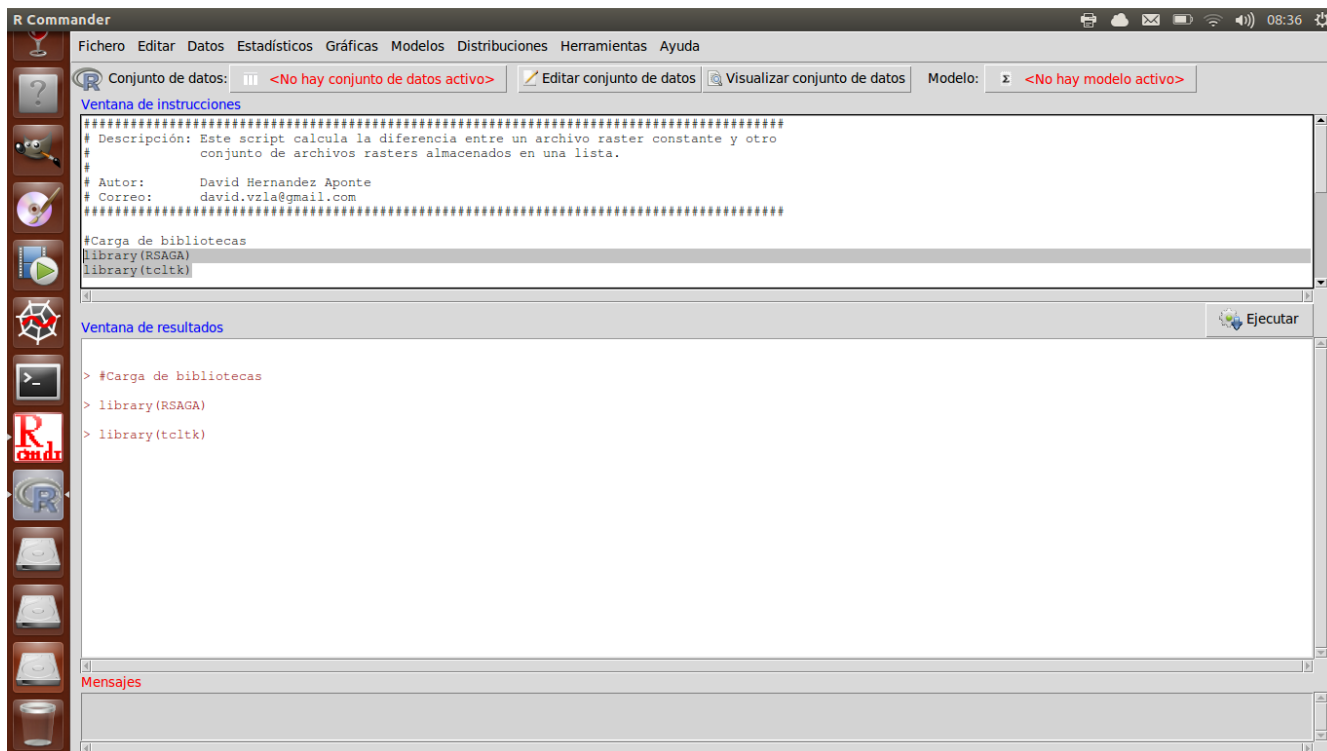

- Move the cursor down and you will note that there is another code to execute.
- Execute the Extensions Filter with which you will work in this script, you will define the extension of the files which will be Saga Grid (.sgrd)

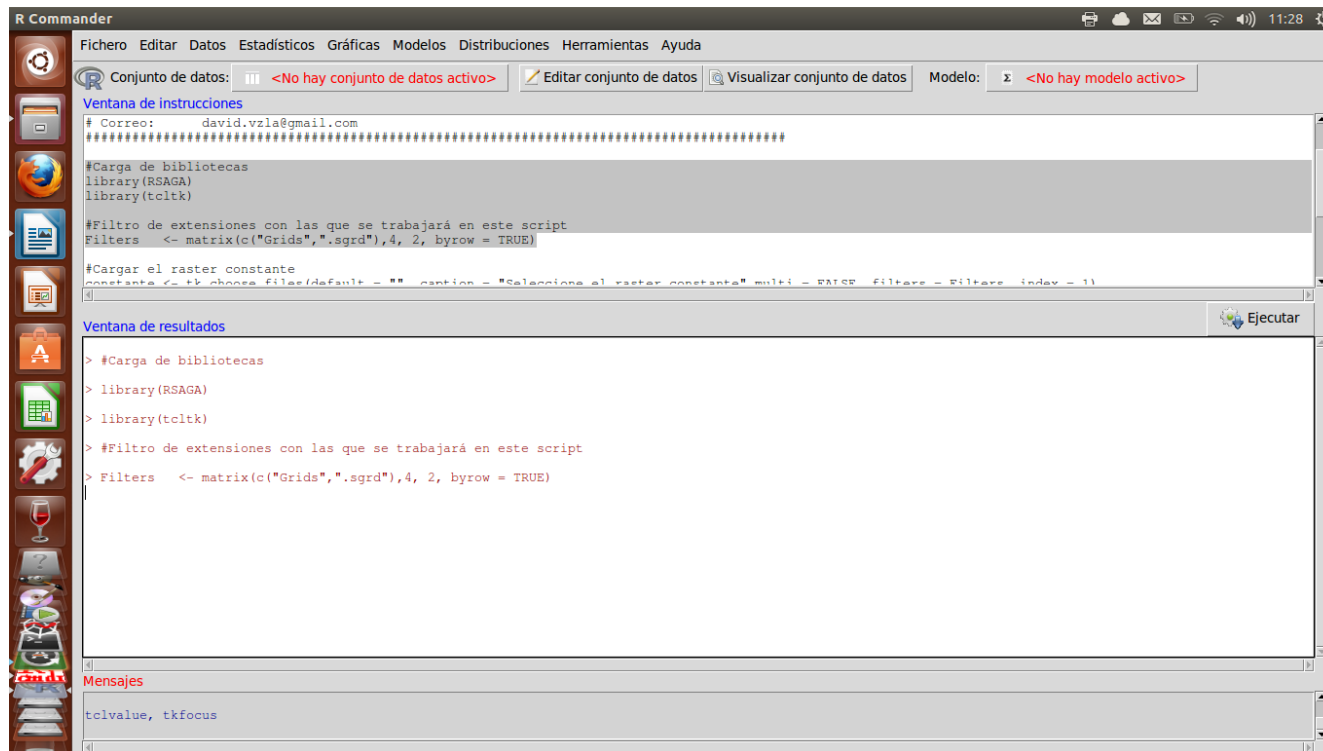

The screenshot shows the R Commander interface. The top menu bar includes 'Fichero', 'Editar', 'Datos', 'Estadísticos', 'Gráficas', 'Modelos', 'Distribuciones', 'Herramientas', and 'Ayuda'. The main window is divided into three panes: 'Ventana de instrucciones' (Instructions window), 'Ventana de resultados' (Results window), and 'Mensajes' (Messages). The 'Ventana de instrucciones' pane contains the following R code:

```
# Correo: david.vzla@gmail.com  
#####  
#Carga de bibliotecas  
library(RSAGA)  
library(tcltk)  
#Filtro de extensiones con las que se trabajará en este script  
Filters <- matrix(c("Grids",".sgrd"),4, 2, byrow = TRUE)  
#Cargar el raster constante  
rastros <- tk_choose_files(default = "", caption = "Selecciona el raster constante" multi = FALSE filters = Filters index = 1)
```

The 'Ventana de resultados' pane shows the output of the executed code:

```
> #Carga de bibliotecas  
> library(RSAGA)  
> library(tcltk)  
> #Filtro de extensiones con las que se trabajará en este script  
> Filters <- matrix(c("Grids",".sgrd"),4, 2, byrow = TRUE)
```

The 'Mensajes' pane shows the output of the 'tk\_choose\_files' function:

```
tclvalue, tkfocus
```

- Execute the instruction to load the rasters

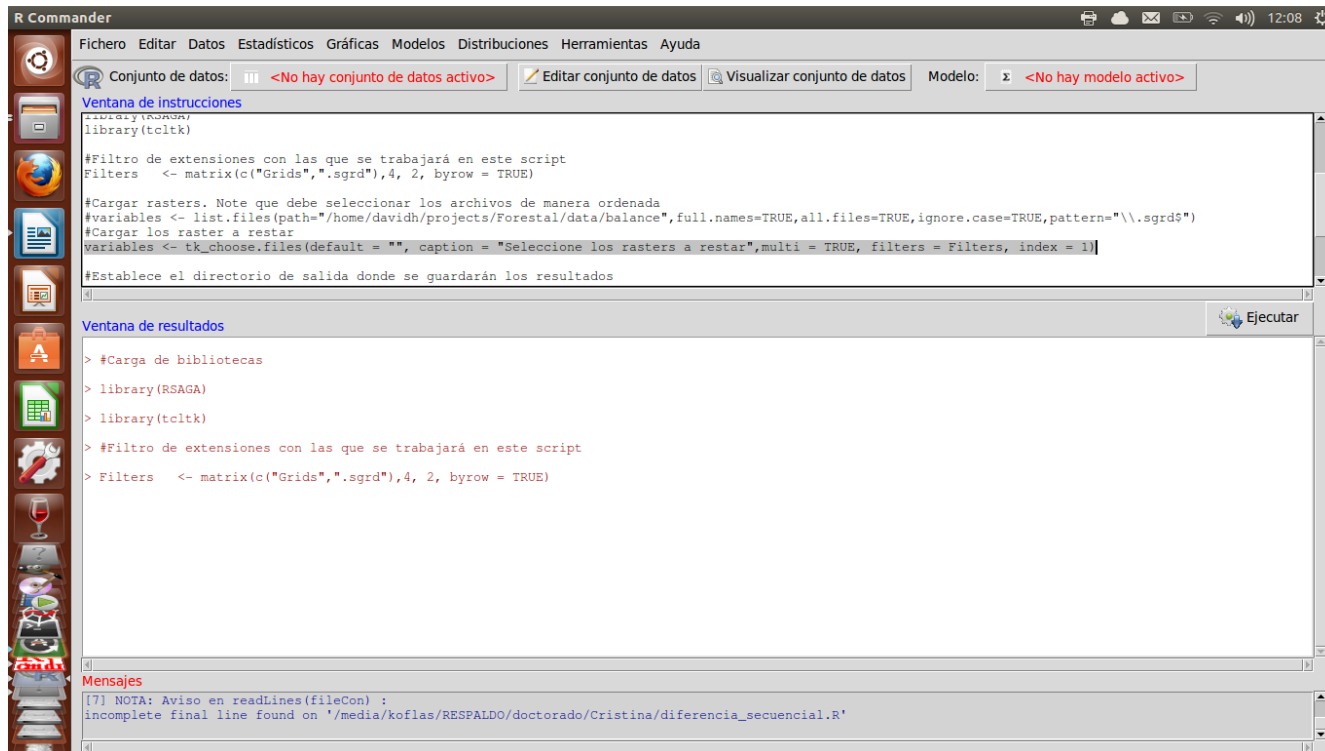

The screenshot shows the R Commander interface. The top menu bar includes 'Fichero', 'Editar', 'Datos', 'Estadísticos', 'Gráficas', 'Modelos', 'Distribuciones', 'Herramientas', and 'Ayuda'. Below the menu, there are buttons for 'Conjunto de datos', 'Editar conjunto de datos', and 'Visualizar conjunto de datos'. The main window is divided into three panes: 'Ventana de instrucciones' (Instructions), 'Ventana de resultados' (Results), and 'Mensajes' (Messages).

```
library(tcltk)

#Filtro de extensiones con las que se trabajará en este script
Filters <- matrix(c("Grids",".sgrd"),4, 2, byrow = TRUE)

#Cargar rasters. Note que debe seleccionar los archivos de manera ordenada
#variables <- list.files(path="/home/davidh/projects/Forestal/data/balance",full.names=TRUE,all.files=TRUE,ignore.case=TRUE,pattern="\\.sgrd$")
#Cargar los raster a restar
variables <- tk_choose.files(default = "", caption = "Seleccione los rasters a restar",multi = TRUE, filters = Filters, index = 1)

#Establece el directorio de salida donde se guardarán los resultados
```

**Ventana de resultados**

```
> #Carga de bibliotecas
> library(RSAGA)
> library(tcltk)
> #Filtro de extensiones con las que se trabajará en este script
> Filters <- matrix(c("Grids",".sgrd"),4, 2, byrow = TRUE)
```

**Mensajes**

```
[7] NOTA: Aviso en readLines(fileCon) :
incomplete final line found on '/media/koflas/RESPALDO/doctorado/Cristina/diferencia_secuencial.R'
```

- Load the frames or in an ordered manner
- Note that you can load multiple files

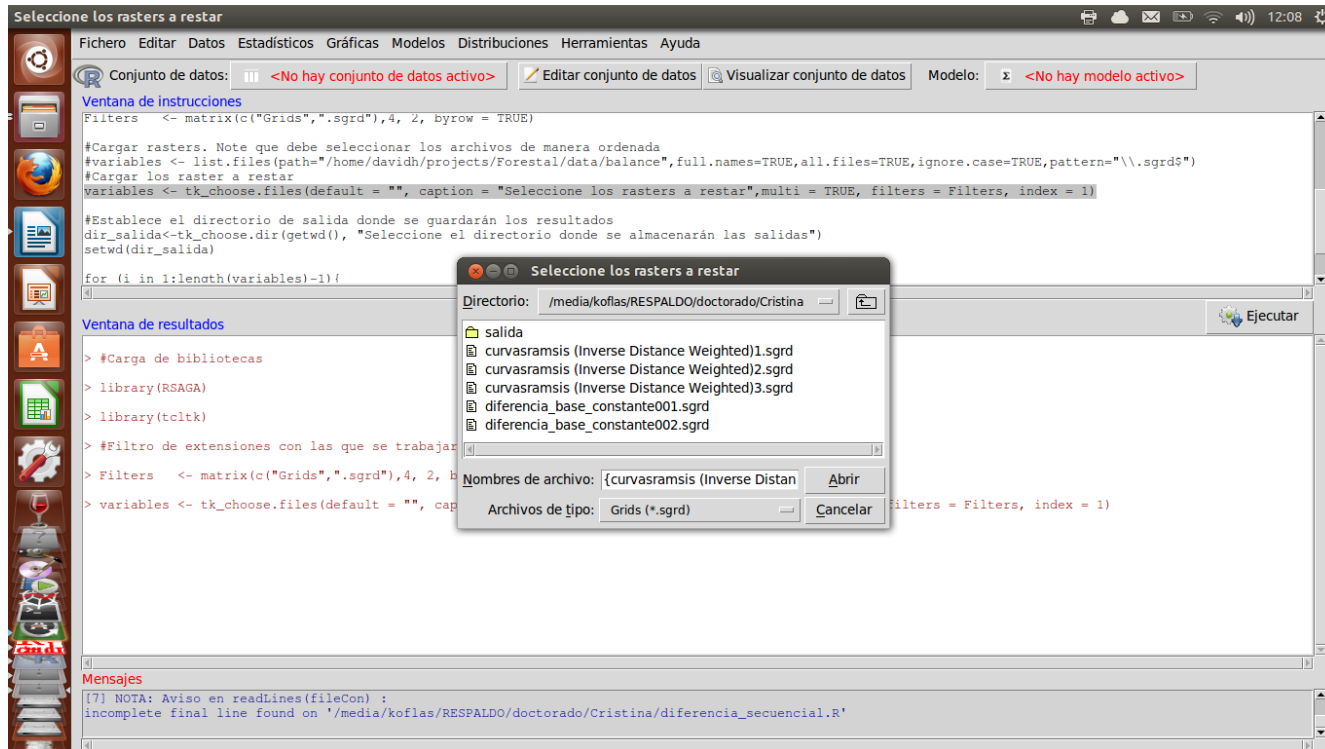

- Choose the output file where the difference rasters will be saved

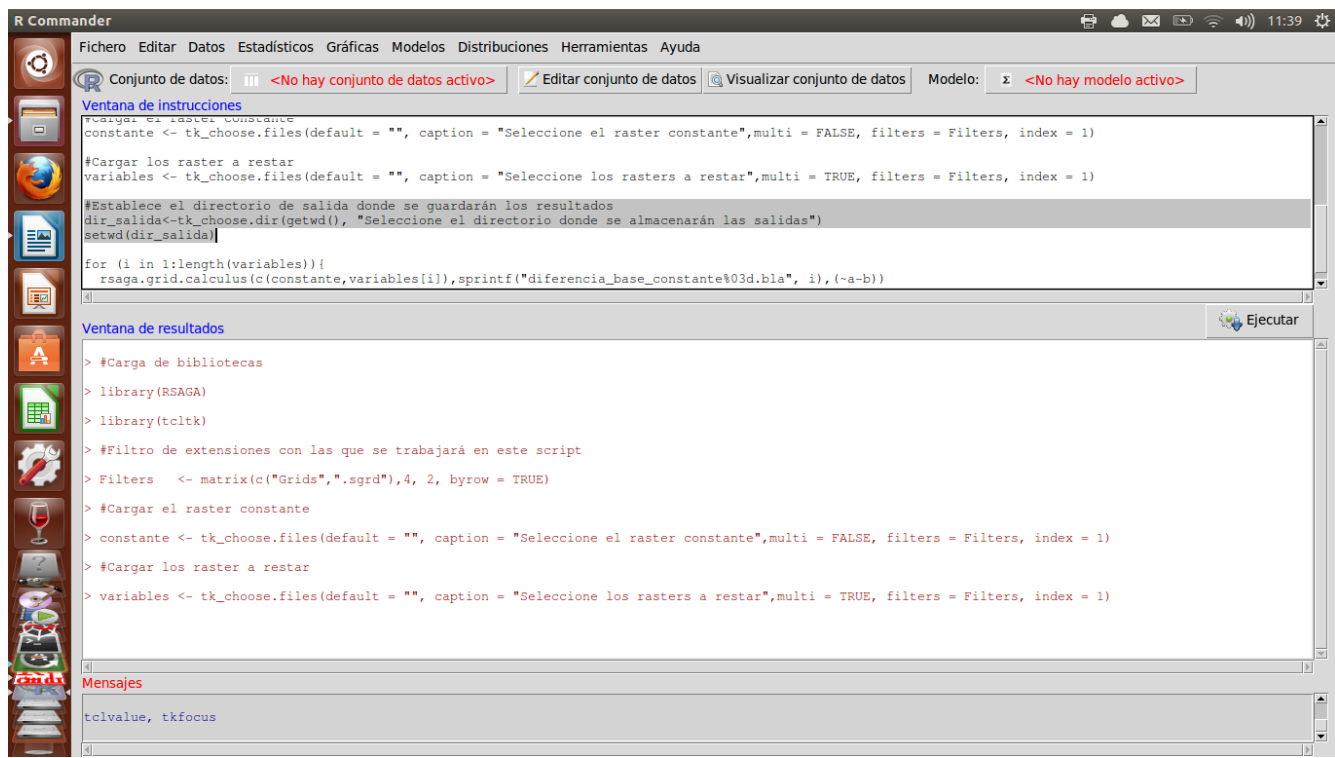

The following window will open ,

- Select the folder to save the difference rasters

Usually , for the script to work out right , it is important for the output folder where the difference rasters will be saved to be in the root of the directory

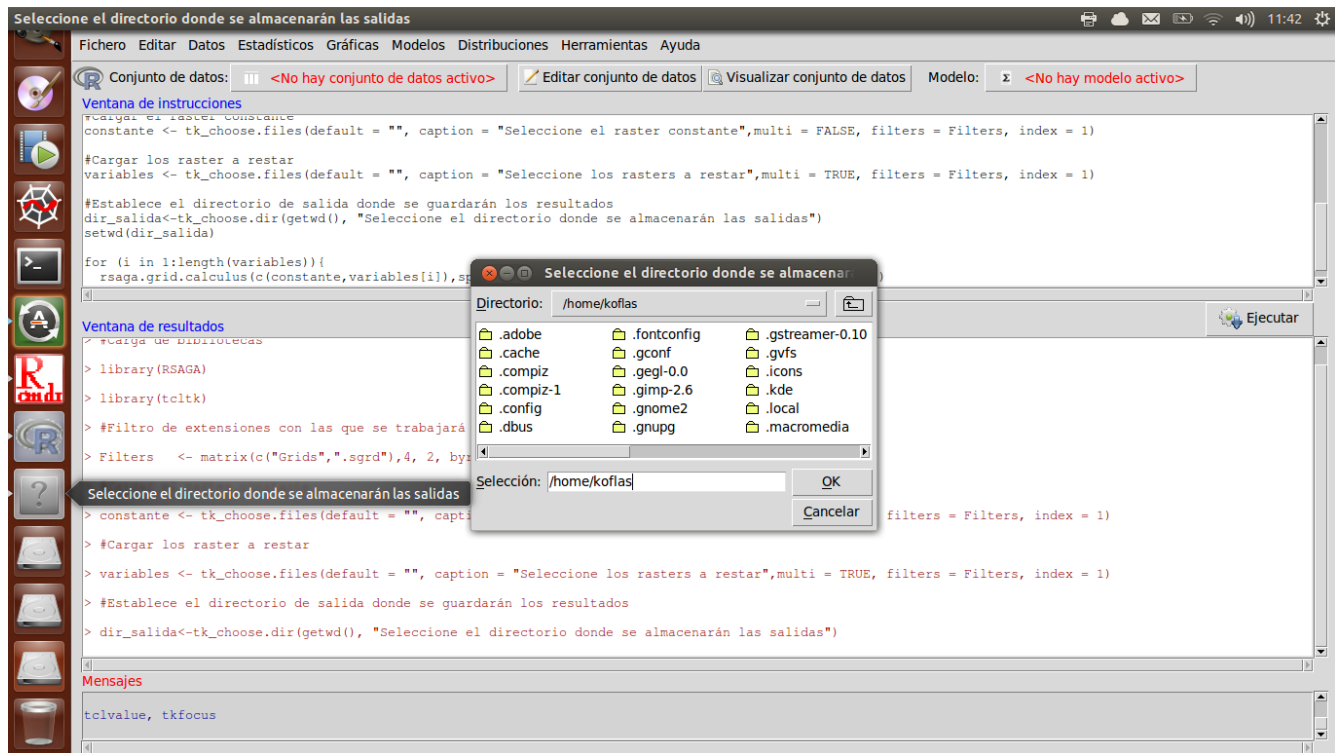



- Choose the folder, the results will be expressed as .sgrd

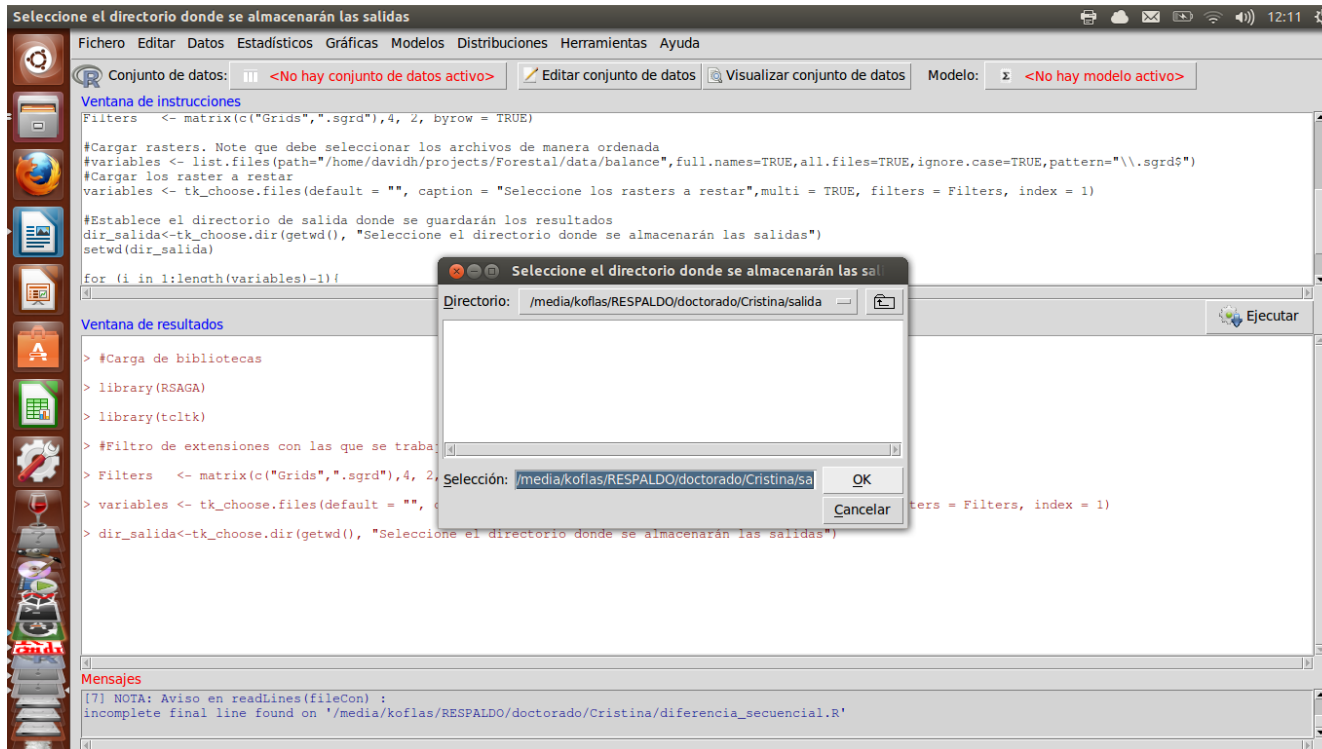

- Select the code for the execution of the difference and press **Execute (Submit)**

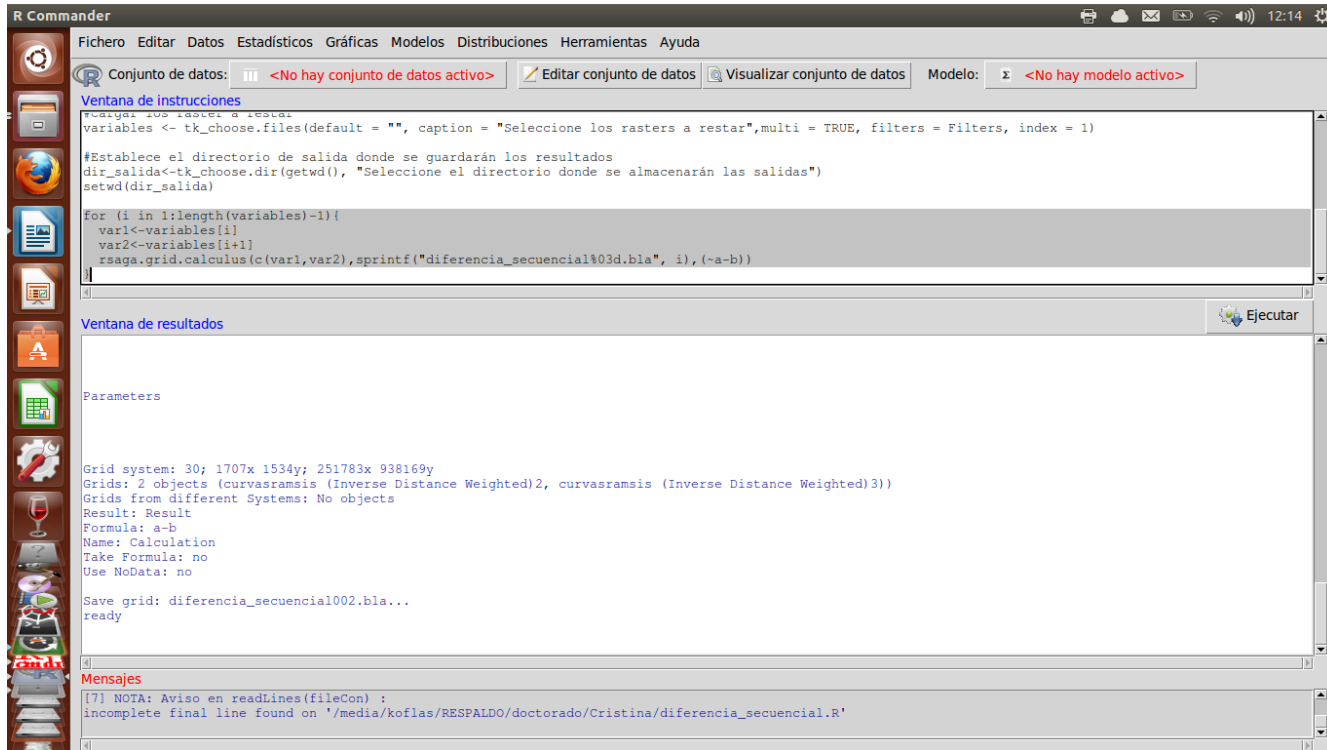

Open the output folder where the rasters were saved, note that the default name will be “diferencia\_abs\_secuencial” and the number of the raster. Note that a SAGA-GIS has three files **.mgrd; .sdatt and .sgrd**. **In order to use the raster, the three files have to be in the same route, therefore, if the file is to be moved, it is better to move the folder.**

Remember that the results will be expressed as sgrd so they must be opened in SAGA-GIS

We have noticed that in the folder of the output file, in addition to the difference rasters, there will be one frame (usually the first frame used to obtain the differences which is named diferencia\_secuencial000). This must be excluded from the next calculations because it is an interfering frame, not a difference raster.

- Open SAGA-GIS

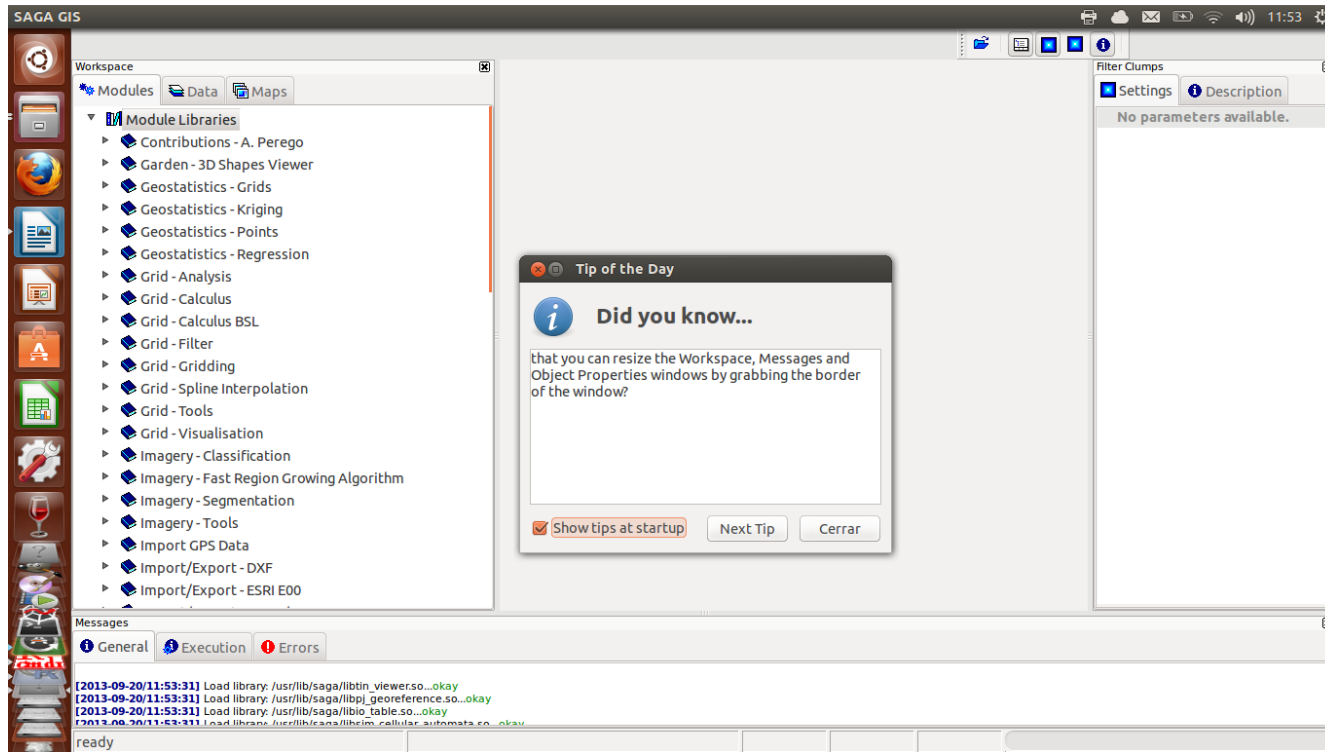

- Close the window **Tip of the Day**

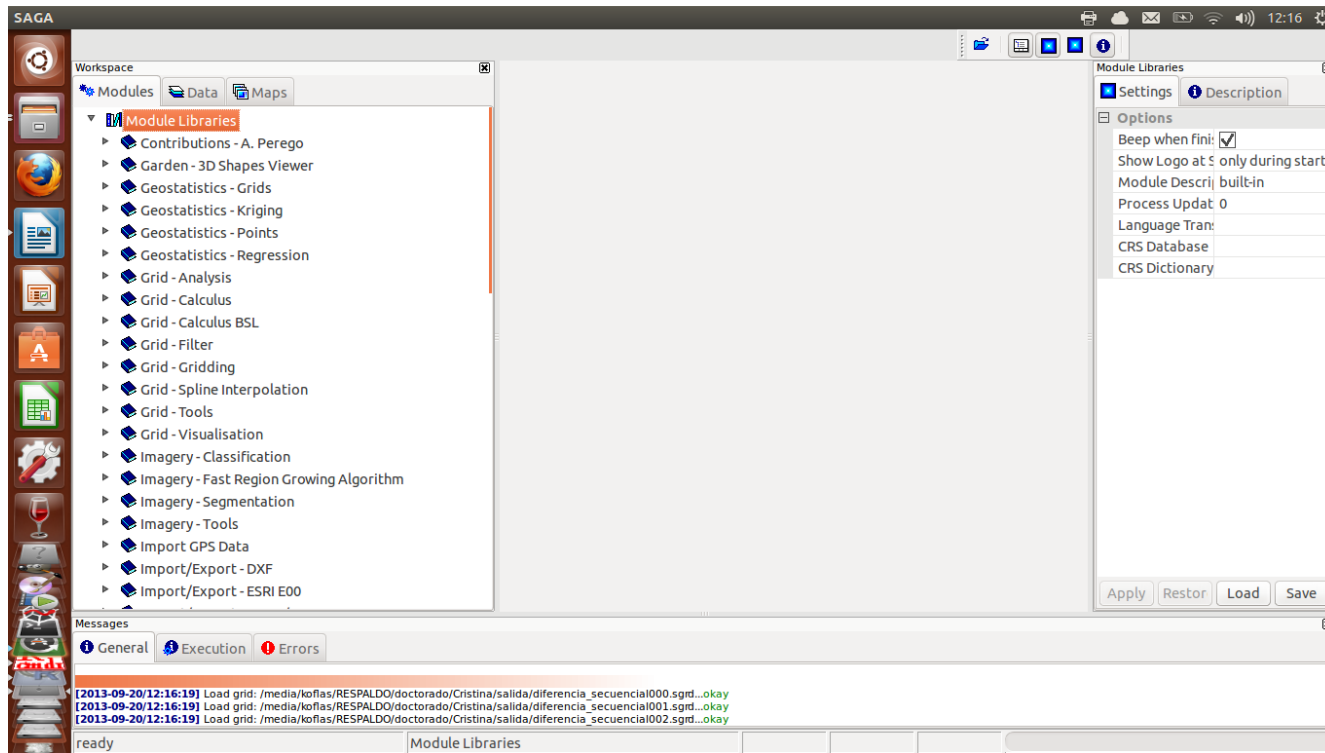

Import the absolute difference rasters in the same manner as the rasters were imported at the beginning, as follows:

- Go to **Module/Import-Export GDAL/OGR**
- Go to **GDAL Import raster**
- Select the folder and the rasters that are to be imported. Remember that there will be one inappropriate frame that must be excluded from the next calculation

## ADDING THE ABSOLUTE DIFFERENCE RASTERS

At this point, the absolute difference rasters are added.

- Go to **Grid Calculus**

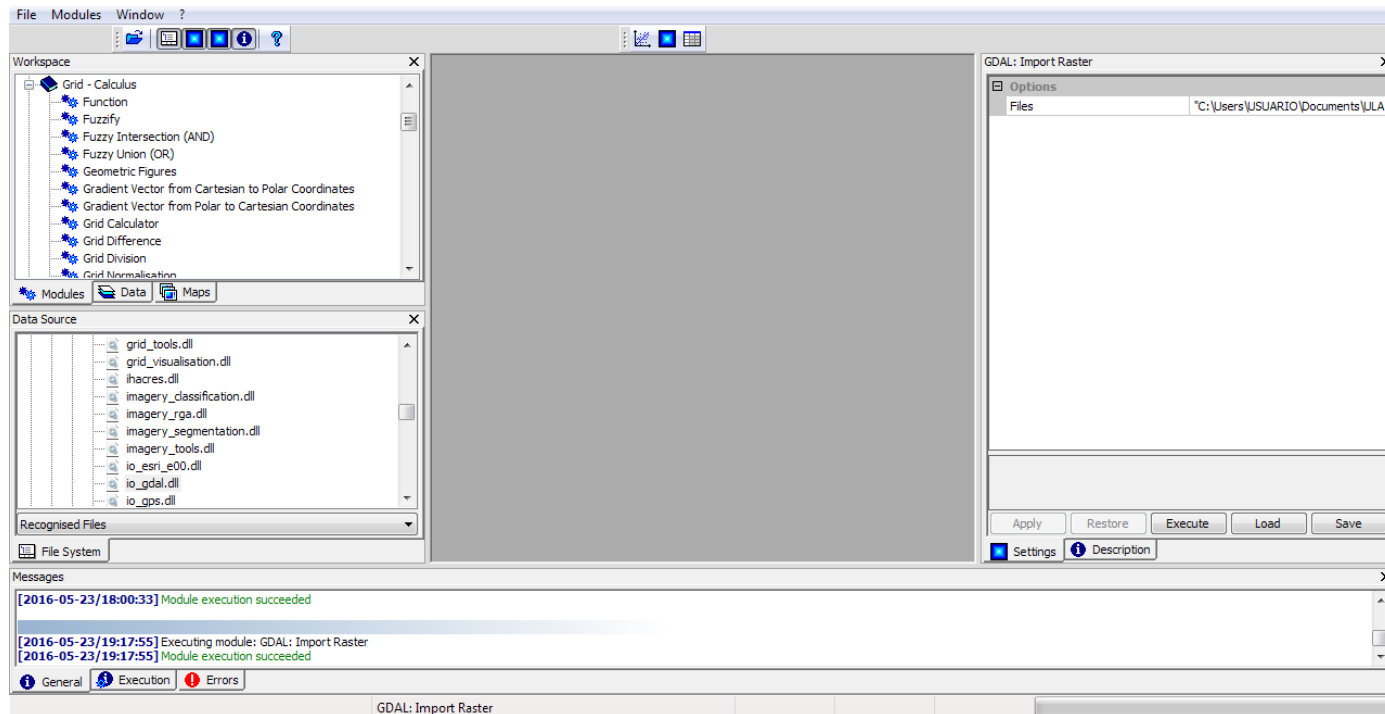

- Select **Grids sum**

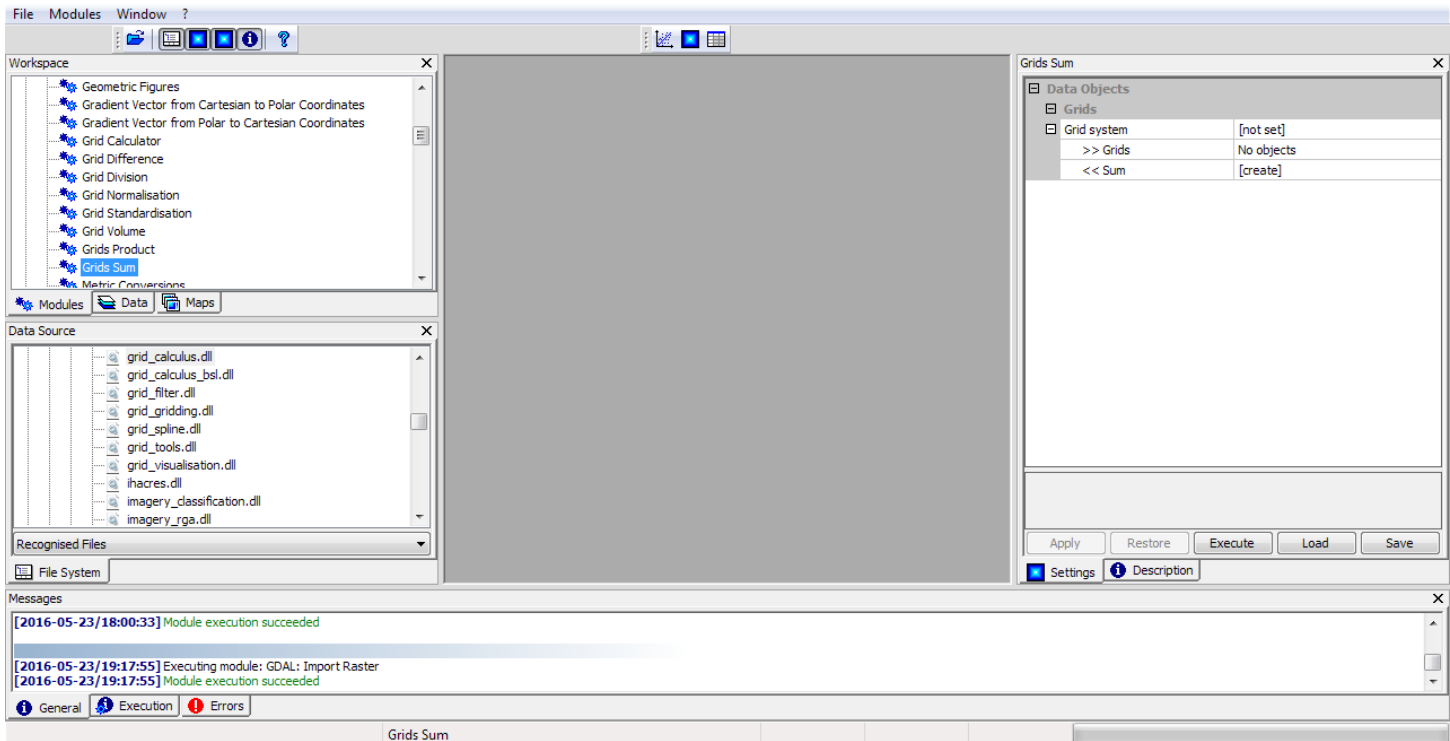



- Select the rasters that are to be added

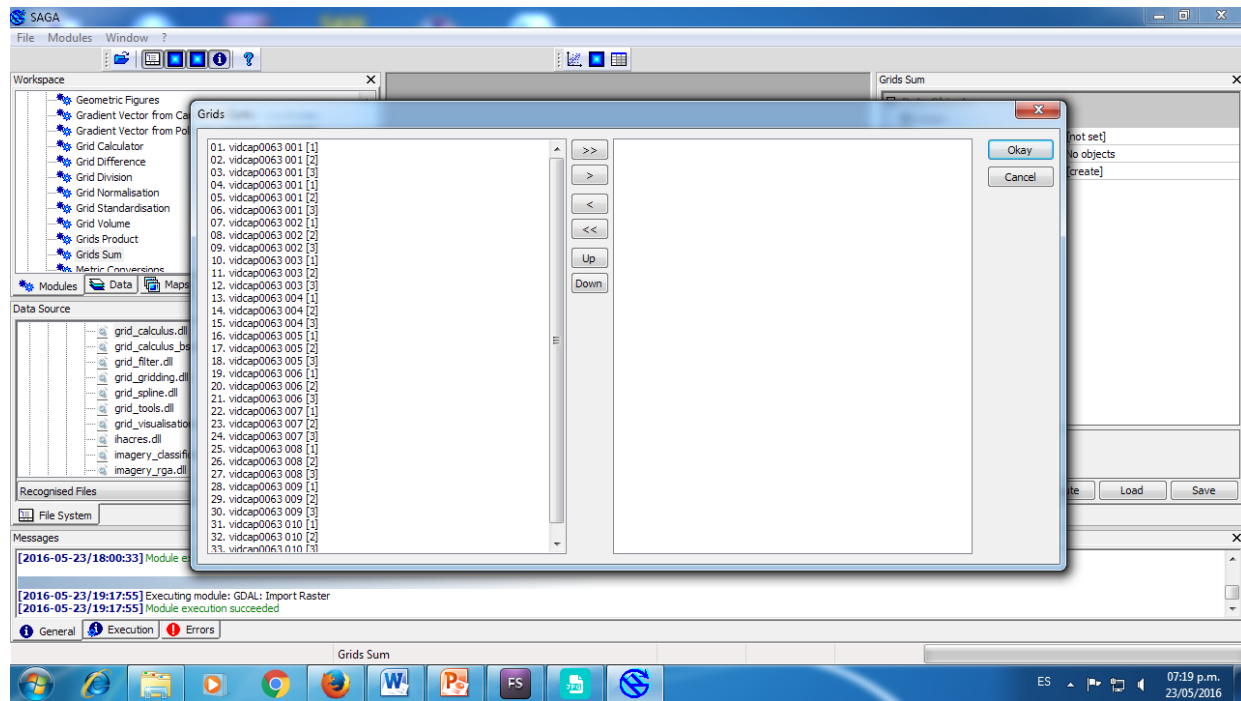

- Go to **Data**
- Click on **Sum**
- Go to **Description** on the right panel and scroll down to the **Arithmetic Mean**, which represents the **mean intensity (I)** of the sum of the absolute value of the difference rasters of a sequence of frames from a video.

The screenshot displays a software interface with the following components:

- Workspace:** A list of video frames, including '26. vidcap0063 008 [2]' through '34. Sum'.
- Data Source:** A list of modules such as 'grid\_calculus.dll', 'grid\_calculus\_bsl.dll', 'grid\_filter.dll', 'grid\_gridding.dll', 'grid\_spline.dll', 'grid\_tools.dll', 'grid\_visualisation.dll', 'ihacres.dll', 'imagery\_classification.dll', and 'imagery\_rga.dll'.
- 34. Sum Description Panel:** A table of statistics for the '34. Sum' operation.

| Property           | Value                        |
|--------------------|------------------------------|
| West-East          | 319                          |
| South              | 0.5                          |
| North              | 239.5                        |
| South-North        | 239                          |
| Cell Size          | 1                            |
| Number of Columns  | 320                          |
| Number of Rows     | 240                          |
| Number of Cells    | 76800                        |
| No Data Cells      | 0                            |
| Value Type         | 4 byte floating point number |
| Value Minimum      | 220                          |
| Value Maximum      | 3695                         |
| Value Range        | 3475                         |
| No Data Value      | -99999                       |
| Arithmetic Mean    | 1207.5540234375001           |
| Standard Deviation | 605.135378339365             |
| Memory Size        | 300.00 kb                    |

The interface also includes a Messages panel at the bottom with the following log entries:

- [2016-05-23/19:17:55] Module execution succeeded
- [2016-05-23/19:22:09] Executing module: Grids Sum
- [2016-05-23/19:22:09] Module execution succeeded
